# Supplementary material for: Herceptin-conjugated plasmonic gold nanocapsules for targeted NIR-II photothermal therapy
Source: Royal Society of Chemistry journal article supplement (doi:10.1039/d4pm00244j), 2024-11-21
Supplement: d4pm00244j1.pdf [file d4pm00244j1.pdf]

*Electronic Supplementary Information*

## Herceptin-Conjugated Plasmonic Gold Nanocapsules for Targeted NIR-II Photothermal Therapy

Prem Singh, Ankita Sarkar, Nivedita Mukherjee, Amit Jaiswal\*

School of Biosciences and Bioengineering, Indian Institute of Technology Mandi,

Kamand, Mandi-175075, Himachal Pradesh, India

\*Corresponding author email: AJ: [j.amit@iitmandi.ac.in](mailto:j.amit@iitmandi.ac.in)

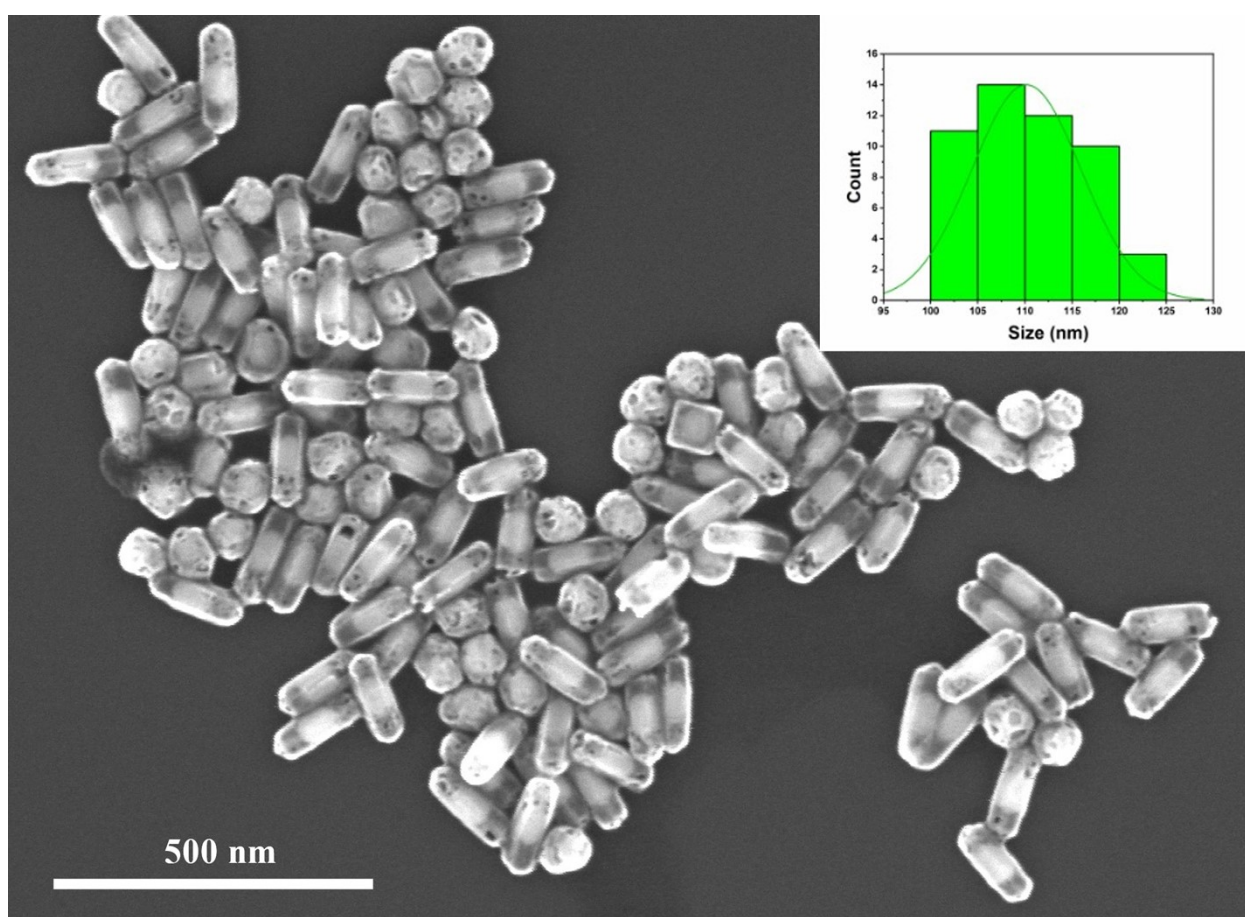

**Figure S1:** SEM image of gold nanocapsules. The inset displays the size histogram of the gold nanocapsules, with a mean size of  $110 \text{ nm} \pm 6 \text{ nm}$ , as measured from the SEM image.

**Table S1:** Summary of the area under the curve for the C1s, O1s, N1s, and S2p regions for bare Au Ncap and Au Ncap-HER.

| Name       | Peak BE | Au Ncap         | Au Ncap-HER     |
|------------|---------|-----------------|-----------------|
|            |         | Area (P) CPS.eV | Area (P) CPS.eV |
| <i>C1s</i> | 285.84  | 1293974.37      | 1502741.61      |
| <i>O1s</i> | 532.76  | 119884.36       | 744429.47       |
| <i>N1s</i> | 402.85  | not detected    | 56338.67        |
| <i>S2p</i> | 162.17  | not detected    | 8675.51         |

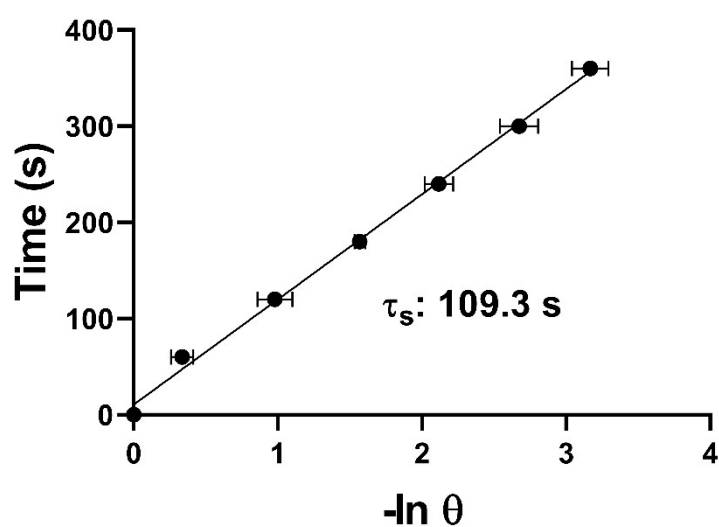

**Figure S2.** Represents the linear time data ( $t$ ) versus  $-\ln(\theta)$  obtained from the cooling period of figure 3 (c).

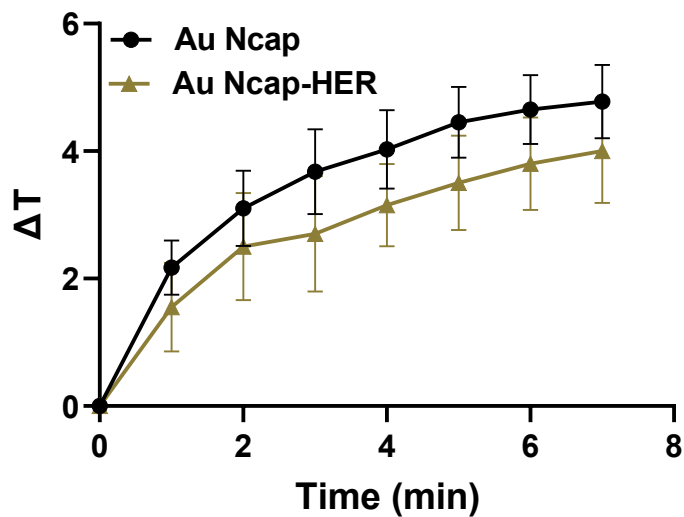

**Figure S3:** Photothermal heating performance of bare gold nanocapsules and Herceptin-conjugated gold nanocapsules at a concentration of 50  $\mu\text{g/ml}$  with a laser power of 0.5  $\text{W/cm}^2$ .
